# Supplementary material for: Effects of early biofilm formation on water quality during commissioning of new polyethylene pipes
Source: Royal Society of Chemistry journal article supplement (doi:10.1039/d2ew00200k), 2022-01-01
Supplement: d2ew00200k1.pdf [file d2ew00200k1.pdf]

## Supplementary information

Relative abundance of 25 water samples (downstream and upstream) and 4 biofilm samples.

|                                    | Downstream |     |      |      |      |      |      |      |      |      |      |     |  | Upstream |      |     |     |      |      |      |      |      |      |      |      |      |
|------------------------------------|------------|-----|------|------|------|------|------|------|------|------|------|-----|--|----------|------|-----|-----|------|------|------|------|------|------|------|------|------|
| f__Comamonadaceae_OTU_4-           | 1.9        | 0.2 | 0.1  | 31.1 | 67.6 | 62.9 | 10.4 | 32.7 | 25.4 | 38.2 | 23.1 | 8   |  | 0        | 0.4  | 0   | 0.2 | 0.4  | 1.4  | 0.2  | 1.2  | 3.9  | 0.2  | 0.3  | 0.4  | 0.2  |
| Nitrospira                         | 2.2        | 6.6 | 3.2  | 11.2 | 3.6  | 3.9  | 13.9 | 6.1  | 7.5  | 8.5  | 9.2  | 4.4 |  | 9.1      | 10.1 | 9.5 | 7   | 10.8 | 10.6 | 14.3 | 14.2 | 12.2 | 10.3 | 12.3 | 13.1 | 13.7 |
| p__Parcubacteria_OTU_12-           | 8.9        | 8.8 | 11.9 | 2.4  | 2.2  | 2.2  | 2.7  | 3.6  | 4.3  | 2.7  | 3.4  | 3.3 |  | 8.1      | 4.8  | 6.4 | 8   | 6.8  | 5.8  | 5.8  | 5.4  | 6    | 5.6  | 5.2  | 2.6  | 4.9  |
| Bdellovibrio                       | 3.8        | 4.3 | 3.8  | 2.8  | 1.7  | 1.7  | 2.9  | 2.7  | 3.2  | 2.4  | 2.6  | 5.2 |  | 5.3      | 4.7  | 4.5 | 3.9 | 4.4  | 4    | 4    | 3.9  | 3.8  | 3.9  | 3.6  | 2.6  | 3.4  |
| Candidatus Nitrotoxa               | 2.2        | 6.4 | 5    | 5.4  | 1.4  | 0.8  | 2.1  | 3.3  | 1.8  | 3.2  | 4    | 5.1 |  | 5.4      | 4.2  | 2.8 | 4.8 | 2.9  | 4.3  | 2.1  | 3.6  | 2.1  | 2.5  | 3.5  | 4.3  | 5    |
| Gallionella                        | 3.1        | 2.7 | 1.8  | 3.3  | 0.6  | 0.6  | 3    | 1.9  | 1.5  | 1.8  | 2.1  | 2.9 |  | 2.7      | 4.2  | 3.8 | 4.8 | 4    | 4.2  | 2.5  | 2.7  | 3.5  | 3.5  | 5    | 4.5  | 4.5  |
| Bacteriovorax                      | 1.7        | 2   | 1.6  | 1.4  | 0.9  | 1.1  | 1.9  | 1.5  | 2.4  | 1.6  | 1.7  | 2.8 |  | 3.4      | 3.8  | 4.5 | 2.3 | 2.5  | 2.3  | 2.8  | 2.7  | 2.4  | 3.3  | 2.8  | 2.7  | 2.5  |
| o__DB1-14_OTU_29-                  | 3.2        | 2.4 | 2.6  | 2.2  | 0.9  | 0.6  | 1.6  | 1.2  | 1.9  | 1.2  | 1.3  | 0.9 |  | 2.1      | 2.1  | 2   | 2.4 | 2.2  | 2.7  | 1.9  | 2.4  | 1.8  | 1.6  | 1.8  | 1.7  | 2.1  |
| p__Parcubacteria_OTU_33-           | 2.5        | 2.7 | 2.8  | 0.6  | 0.6  | 0.8  | 1.4  | 1.6  | 1.5  | 0.8  | 1.2  | 1.3 |  | 1.9      | 1.7  | 1.9 | 2.9 | 3.3  | 1.1  | 2.7  | 2.3  | 2.9  | 2.7  | 2.1  | 0.7  | 1.3  |
| Nitrosomonas                       | 1.1        | 2.2 | 2.5  | 0.9  | 0.5  | 0.4  | 2    | 1.3  | 1    | 1    | 2.1  | 2   |  | 2        | 3.4  | 1.9 | 2.7 | 1.2  | 2.4  | 1    | 1.6  | 1.7  | 1.1  | 1.7  | 2.6  | 3.6  |
| f__Gallionellaceae_OTU_104-        | 1.6        | 2.1 | 1.7  | 1.6  | 0.6  | 0.4  | 1    | 0.9  | 1.2  | 1.1  | 1.9  | 1.8 |  | 3.3      | 2.2  | 1.4 | 2.1 | 1.5  | 2.4  | 0.8  | 1.2  | 1.1  | 1    | 1.6  | 1.7  | 1.5  |
| Woodsholea                         | 0.9        | 1.4 | 1.2  | 1.1  | 0.5  | 0.5  | 1.3  | 0.9  | 1.6  | 1.5  | 1.9  | 1.6 |  | 1        | 1.1  | 1.7 | 1.3 | 1.5  | 2.1  | 1.5  | 1.6  | 1.7  | 1.7  | 1.9  | 1.3  | 1.4  |
| p__Parcubacteria_OTU_48-           | 1.7        | 1.3 | 1.8  | 0.6  | 0.4  | 0.5  | 1.1  | 0.7  | 0.9  | 0.5  | 0.5  | 0.6 |  | 1.1      | 1.2  | 2.2 | 2.2 | 1.7  | 1.3  | 1.4  | 1    | 1.5  | 1.2  | 1.1  | 0.9  | 0.9  |
| p__Parcubacteria_OTU_83-           | 1.1        | 1.4 | 2    | 0.5  | 0.3  | 0.6  | 1    | 1    | 1    | 0.5  | 0.6  | 0.7 |  | 1.2      | 1.1  | 1.1 | 1.3 | 1.8  | 1    | 1.4  | 1.4  | 1.5  | 1.5  | 1.3  | 0.4  | 0.7  |
| p__Gracilibacteria_OTU_63-         | 1.7        | 1.2 | 1.1  | 0.5  | 0.4  | 0.5  | 1    | 0.8  | 0.7  | 0.3  | 0.7  | 0.7 |  | 1.5      | 1.3  | 2.1 | 1.6 | 1.2  | 1.1  | 0.8  | 1.2  | 0.9  | 1.1  | 1.1  | 0.8  | 1.3  |
| Sideroxydans                       | 1.5        | 0.9 | 0.7  | 1.3  | 0.2  | 0.2  | 1.3  | 0.5  | 0.7  | 0.5  | 0.6  | 1.1 |  | 1        | 1.6  | 1.1 | 0.8 | 1.6  | 0.9  | 1.1  | 1    | 1.5  | 1.2  | 1.4  | 1    | 0.9  |
| p__Parcubacteria_OTU_67-           | 1.3        | 1.2 | 1.1  | 0.5  | 0.3  | 0.4  | 0.7  | 0.7  | 0.8  | 0.5  | 0.5  | 1.1 |  | 1.1      | 1.2  | 1.2 | 1.5 | 1.2  | 0.9  | 1    | 1.2  | 1.1  | 1.3  | 1.1  | 0.5  | 1.3  |
| Massilia                           | 0.1        | 0.1 | 0.2  | 0.1  | 0    | 0.1  | 1    | 0.7  | 0.5  | 0.2  | 2.2  | 0   |  | 0        | 0    | 0   | 0.1 | 0    | 1.1  | 3.4  | 0.3  | 1.1  | 4.1  | 1.5  | 5.4  | 0.3  |
| f__SM2D12_OTU_112-                 | 0.8        | 0.7 | 0.5  | 0.1  | 0.1  | 0.3  | 0.4  | 0.5  | 0.4  | 0.5  | 0.9  | 1.4 |  | 1        | 0.9  | 1.8 | 1.2 | 0.5  | 0.9  | 0.4  | 0.9  | 0.6  | 0.6  | 0.8  | 0.6  | 0.8  |
| Brevundimonas                      | 2.4        | 0.1 | 1    | 0.1  | 0    | 0.1  | 0.6  | 0.2  | 0.2  | 0.2  | 1.5  | 0.3 |  | 0.1      | 0.5  | 0.1 | 0.2 | 0.1  | 0.4  | 0.4  | 0.3  | 0.5  | 2    | 1    | 3.6  | 0.1  |
| p__Parcubacteria_OTU_95-           | 0.9        | 0.8 | 0.9  | 0.1  | 0.2  | 0.3  | 0.4  | 0.3  | 0.5  | 0.2  | 0.2  | 0.4 |  | 0.3      | 0.6  | 1   | 1.4 | 0.7  | 1.1  | 0.5  | 0.7  | 0.7  | 0.7  | 0.6  | 0.4  | 0.7  |
| o__Lineage IV_OTU_157-             | 0.7        | 0.7 | 0.5  | 0.3  | 0.3  | 0.3  | 1.1  | 0.4  | 0.5  | 0.3  | 0.5  | 0.5 |  | 0.6      | 0.6  | 0.6 | 0.6 | 0.8  | 0.5  | 0.9  | 0.7  | 0.6  | 0.7  | 0.9  | 0.3  | 0.4  |
| p__Candidate division OP3_OTU_257- | 0.4        | 0.7 | 0.6  | 1.1  | 0.2  | 0.3  | 0.1  | 0.3  | 0.4  | 0.3  | 0.4  | 0.5 |  | 0.9      | 0.9  | 0.8 | 0.6 | 0.6  | 0.6  | 0.7  | 0.8  | 0.6  | 0.7  | 0.8  | 0.3  | 0.3  |
| p__Parcubacteria_OTU_86-           | 0.8        | 0.8 | 1.3  | 0.1  | 0.1  | 0.2  | 0.3  | 0.4  | 0.4  | 0.2  | 0.3  | 0.4 |  | 0.7      | 0.7  | 0.9 | 0.9 | 0.9  | 0.5  | 0.7  | 0.7  | 0.6  | 0.7  | 0.5  | 0.3  | 0.4  |
| p__Parcubacteria_OTU_106-          | 0.7        | 0.7 | 0.9  | 0.2  | 0.2  | 0.3  | 0.9  | 0.3  | 0.5  | 0.2  | 0.5  | 0.2 |  | 0.7      | 0.5  | 0.7 | 0.6 | 0.7  | 0.5  | 0.6  | 0.6  | 0.8  | 0.7  | 0.5  | 0.2  | 0.5  |
| f__env.OPS17_OTU_94-               | 1.4        | 0.7 | 0.8  | 0.3  | 0.3  | 0.2  | 0.4  | 0.3  | 0.4  | 0.5  | 0.3  | 0.5 |  | 1        | 0.6  | 0.4 | 0.4 | 0.6  | 0.4  | 0.5  | 0.4  | 0.5  | 0.5  | 0.6  | 0.4  | 0.6  |
| Pseudomonas                        | 0.7        | 0   | 0.1  | 0.6  | 0.4  | 0.2  | 0.1  | 0.2  | 0.1  | 0    | 0.4  | 0.1 |  | 0.1      | 0.2  | 0   | 0   | 0.2  | 0.8  | 4.5  | 0.1  | 0    | 2    | 0.7  | 1.5  | 0    |
| f__Cytophagaceae_OTU_120-          | 0.5        | 0.3 | 0.5  | 0.2  | 0.2  | 0.1  | 0.1  | 0.3  | 0.4  | 0.5  | 0.2  | 0.2 |  | 0.4      | 0.4  | 0.5 | 0.4 | 0.7  | 1    | 1    | 1    | 1    | 0.5  | 0.4  | 1    | 0.7  |
| p__Parcubacteria_OTU_101-          | 0.6        | 0.7 | 0.9  | 0.2  | 0.2  | 0.2  | 0.4  | 0.6  | 0.4  | 0.2  | 0.3  | 0.5 |  | 0.6      | 0.5  | 0.6 | 0.7 | 0.6  | 0.3  | 0.5  | 0.6  | 0.7  | 0.6  | 0.6  | 0.2  | 0.4  |
| Acinetobacter                      | 0.3        | 0   | 0.1  | 0.9  | 0.2  | 0.2  | 0.1  | 0.1  | 0    | 0.1  | 0.4  | 0   |  | 0        | 0    | 0   | 0.2 | 0.6  | 1.4  | 0.7  | 0.1  | 0    | 1.9  | 1.7  | 3.4  | 0    |
| o__Caenarcaniphilales_OTU_123-     | 0.5        | 0.5 | 1.4  | 0.7  | 0.2  | 0.2  | 0.6  | 0.4  | 0.5  | 0.5  | 0.4  | 0.3 |  | 0.6      | 0.3  | 0.6 | 0.6 | 0.4  | 0.6  | 0.6  | 0.4  | 0.4  | 0.3  | 0.3  | 0.4  | 0.5  |
| o__Oligoflexales_OTU_167-          | 0.6        | 0.5 | 0.4  | 0.2  | 0.1  | 0.1  | 0.4  | 0.2  | 0.3  | 0.3  | 0.2  | 0.2 |  | 0.7      | 0.7  | 0.4 | 0.8 | 0.9  | 1.1  | 0.6  | 0.4  | 0.6  | 0.5  | 0.4  | 0.3  | 0.5  |
| p__Parcubacteria_OTU_3272-         | 0.5        | 0.5 | 0.6  | 0.4  | 0.2  | 0.2  | 0.7  | 0.2  | 0.3  | 0.2  | 0.2  | 0.3 |  | 0.4      | 0.5  | 0.5 | 0.7 | 0.7  | 0.4  | 0.5  | 0.7  | 0.7  | 0.6  | 0.4  | 0.2  | 0.4  |
| p__Parcubacteria_OTU_160-          | 0.6        | 0.9 | 0.8  | 0.2  | 0.1  | 0.2  | 0.1  | 0.4  | 0.4  | 0.3  | 0.3  | 0.4 |  | 0.5      | 0.5  | 0.6 | 0.5 | 0.7  | 0.3  | 0.5  | 0.5  | 0.6  | 0.6  | 0.5  | 0.2  | 0.3  |
| Enhydrobacter                      | 0.4        | 0   | 0    | 0    | 0    | 0    | 0    | 0    | 1.6  | 1.5  | 1.1  | 0   |  | 0        | 0    | 0   | 0   | 0    | 0    | 0    | 0    | 0.1  | 0.4  | 0.5  | 1.8  | 2.8  |
| o__Lineage IV_OTU_541-             | 0.6        | 0.4 | 0.3  | 0.7  | 0.1  | 0.3  | 0.3  | 0.4  | 0.4  | 0.2  | 0.4  | 0.2 |  | 0.4      | 0.4  | 0.4 | 0.5 | 0.5  | 0.3  | 0.5  | 0.7  | 0.4  | 0.5  | 0.5  | 0.2  | 0.2  |
| f__A0839_OTU_75-                   | 0.5        | 0.5 | 0.5  | 0.7  | 0.2  | 0.1  | 0.1  | 0.3  | 0.3  | 0.2  | 0.2  | 0.1 |  | 0.3      | 0.4  | 0.2 | 0.3 | 0.6  | 0.6  | 0.8  | 0.5  | 0.5  | 0.3  | 0.4  | 0.5  | 0.5  |
| Flavobacterium                     | 0.2        | 0   | 0.1  | 0.2  | 0    | 0    | 0.1  | 0.2  | 1.7  | 3.9  | 2.1  | 0.3 |  | 0        | 0.1  | 0.1 | 0   | 0    | 0    | 0    | 0    | 0    | 0    | 0.1  | 0.1  | 0.1  |
| p__Parcubacteria_OTU_131-          | 0.3        | 0.5 | 1    | 0.3  | 0.1  | 0.2  | 0.1  | 0.3  | 0.3  | 0.3  | 0.4  | 0.4 |  | 0.5      | 0.5  | 0.4 | 0.4 | 0.5  | 0.4  | 0.3  | 0.5  | 0.5  | 0.4  | 0.4  | 0.2  | 0.3  |
| Aquabacterium                      | 0          | 0   | 0    | 0.5  | 1.8  | 2.3  | 0.1  | 0.9  | 0.5  | 0.6  | 0.5  | 1   |  | 0        | 0    | 0   | 0   | 0.1  | 0.2  | 0.1  | 0    | 0.4  | 0    | 0.2  | 0    | 0.1  |
| f__Nitrosomonadaceae_OTU_71-       | 0.5        | 0.5 | 0.4  | 0.4  | 0.1  | 0.1  | 0.4  | 0.3  | 0.3  | 0.3  | 0.3  | 0.4 |  | 0.5      | 0.2  | 0.3 | 0.4 | 0.5  | 0.4  | 0.5  | 0.4  | 0.4  | 0.5  | 0.4  | 0.3  | 0.4  |
| p__Parcubacteria_OTU_130-          | 0.4        | 0.4 | 0.7  | 0.1  | 0.1  | 0.2  | 0.6  | 0.2  | 0.4  | 0.2  | 0.3  | 0.3 |  | 0.3      | 0.5  | 0.5 | 0.6 | 0.6  | 0.3  | 0.4  | 0.4  | 0.5  | 0.6  | 0.4  | 0.1  | 0.3  |
| p__Parcubacteria_OTU_156-          | 0.4        | 0.7 | 1.1  | 0.4  | 0.1  | 0.2  | 0.1  | 0.2  | 0.3  | 0.1  | 0.2  | 0.1 |  | 0.4      | 0.3  | 0.4 | 0.5 | 0.6  | 0.3  | 0.5  | 0.3  | 0.4  | 0.3  | 0.3  | 0.2  | 0.3  |
| o__Caenarcaniphilales_OTU_154-     | 0.5        | 0.5 | 0.6  | 0.2  | 0.2  | 0.2  | 0.4  | 0.2  | 0.3  | 0.3  | 0.4  | 0.2 |  | 0.6      | 0.3  | 0.3 | 0.4 | 0.4  | 0.5  | 0.3  | 0.4  | 0.4  | 0.3  | 0.3  | 0.2  | 0.4  |
| p__Candidate division OP3_OTU_342- | 0.5        | 0.4 | 0.3  | 0.2  | 0.1  | 0.2  | 0    | 0.3  | 0.2  | 0.2  | 0.3  | 0.3 |  | 0.7      | 0.5  | 0.3 | 0.5 | 0.3  | 0.5  | 0.4  | 0.5  | 0.4  | 0.4  | 0.4  | 0.4  | 0.4  |
| o__Subgroup 6_OTU_258-             | 0.4        | 0.4 | 0.1  | 0.7  | 0.1  | 0.3  | 0.3  | 0.4  | 0.2  | 0.3  | 0.2  | 0.6 |  | 0.6      | 0.3  | 0.5 | 0.4 | 0.2  | 0.4  | 0.3  | 0.4  | 0.2  | 0.3  | 0.3  | 0.3  | 0.4  |
| p__Proteobacteria_OTU_180-         | 0.5        | 0.3 | 0.5  | 0.2  | 0.1  | 0.2  | 0.6  | 0.3  | 0.3  | 0.3  | 0.2  | 0.3 |  | 0.6      | 0.5  | 0.4 | 0.3 | 0.3  | 0.4  | 0.4  | 0.3  | 0.4  | 0.3  | 0.3  | 0.2  | 0.2  |
| p__Saccharibacteria_OTU_331-       | 1          | 0.4 | 0.3  | 0.2  | 0.1  | 0.1  | 0.3  | 0.3  | 0.2  | 0.1  | 0.1  | 0.5 |  | 0.4      | 0.3  | 0.4 | 0.4 | 0.6  | 0.1  | 0.4  | 0.5  | 0.3  | 0.3  | 0.5  | 0.1  | 0.2  |
| Haliangium                         | 0.1        | 0.4 | 0.1  | 0.6  | 0.1  | 0.1  | 0.3  | 0.1  | 0.2  | 0.5  | 0.3  | 0.4 |  | 0.2      | 0.3  | 0.6 | 0.3 | 0.3  | 0.4  | 0.1  | 0.3  | 0.2  | 0.3  | 0.4  | 0.8  | 0.6  |
| Sphingobium                        | 0.4        | 0   | 0    | 0    | 0    | 0    | 0.4  | 0.1  | 0.1  | 0    | 1.4  | 0.1 |  | 0        | 0.1  | 0   | 0   | 0    | 0.1  | 0    | 0.1  | 0.4  | 2.2  | 0.6  | 1.7  | 0    |
|                                    | <          | 0   | 0    | 0    | 0    | 0    | 0    | 0    | 0    | 0    | 0    | 0   |  | 0        | 0    | 0   | 0   | 0    | 0    | 0    | 0    | 0    | 0    | 0    | 0    | 0    |

Figure SI.1: The 50 most abundant bacteria (phylum, genus) found with amplicon sequencing in **downstream (A-M)** and **upstream (01-13)** water samples. The water samples were taken from September 19, 2017 to October 13, 2017. The colour bar indicates percentage relative abundance in the samples.

|                            | Biofilm |      |      |      | Downstream |     |      |      |      |      |      |      |      |      |      |     |     | Upstream |     |     |      |      |      |      |      |      |      |      |      |    |
|----------------------------|---------|------|------|------|------------|-----|------|------|------|------|------|------|------|------|------|-----|-----|----------|-----|-----|------|------|------|------|------|------|------|------|------|----|
| f__Comamonadaceae_OTU_4    | 4.9     | 8.5  | 8    | 4.5  | 1.9        | 0.2 | 0.1  | 31.1 | 67.6 | 62.9 | 10.4 | 32.7 | 25.4 | 38.2 | 23.1 | 8   | 0   | 0.4      | 0   | 0.2 | 0.4  | 1.4  | 0.2  | 1.2  | 3.9  | 0.2  | 0.3  | 0.4  | 0.2  |    |
| Nitrospira                 | 0.4     | 0    | 0    | 0.3  | 2.2        | 6.6 | 3.2  | 11.2 | 3.6  | 3.9  | 13.9 | 6.1  | 7.5  | 8.5  | 9.2  | 4.4 | 9.1 | 10.1     | 9.5 | 7   | 10.8 | 10.6 | 14.3 | 14.2 | 12.2 | 10.3 | 12.3 | 13.1 | 13.7 |    |
| p__Parcubacteria_OTU_12    | 0       | 0.2  | 0.1  | 0    | 8.9        | 8.8 | 11.9 | 2.4  | 2.2  | 2.2  | 2.7  | 3.6  | 4.3  | 2.7  | 3.4  | 3.3 | 8.1 | 4.8      | 6.4 | 8   | 6.8  | 5.8  | 5.8  | 5.4  | 6    | 5.6  | 5.2  | 2.6  | 4.9  |    |
| Bdellovibrio               | 1.2     | 1    | 1.4  | 0.2  | 3.8        | 4.3 | 3.8  | 2.8  | 1.7  | 1.7  | 2.9  | 2.7  | 3.2  | 2.4  | 2.6  | 5.2 | 5.3 | 4.7      | 4.5 | 3.9 | 4.4  | 4    | 4    | 3.9  | 3.8  | 3.9  | 3.6  | 2.6  | 3.4  |    |
| Candidatus Nitroto         | 0       | 0    | 0    | 0    | 2.2        | 6.4 | 5    | 5.4  | 1.4  | 0.8  | 2.1  | 3.3  | 1.8  | 3.2  | 4    | 5.1 | 5.4 | 4.2      | 2.8 | 4.8 | 2.9  | 4.3  | 2.1  | 3.6  | 2.1  | 2.5  | 3.5  | 4.3  | 5    |    |
| Gallionella                | 0       | 0    | 0    | 0    | 3.1        | 2.7 | 1.8  | 3.3  | 0.6  | 0.6  | 3    | 1.9  | 1.5  | 1.8  | 2.1  | 2.9 | 2.7 | 4.2      | 3.8 | 4.8 | 4    | 4.2  | 2.5  | 2.7  | 3.5  | 3.5  | 5    | 4.5  | 4.5  |    |
| Aquabacterium              | 3.2     | 29.2 | 26.5 | 5.7  | 0          | 0   | 0    | 0.5  | 1.8  | 2.3  | 0.1  | 0.9  | 0.5  | 0.6  | 0.5  | 1   | 0   | 0        | 0   | 0   | 0.1  | 0.2  | 0.1  | 0    | 0.4  | 0    | 0.2  | 0    | 0.1  |    |
| Patulibacter               | 22.5    | 6.6  | 13.7 | 14.5 | 0          | 0   | 0    | 0    | 0    | 0    | 0    | 0    | 0.1  | 0.1  | 0    | 1.6 | 0   | 0        | 0   | 0   | 0    | 0    | 0    | 0    | 0    | 0    | 0    | 0    | 0.1  |    |
| Bacteriovorax              | 0       | 0    | 0    | 0    | 1.7        | 2   | 1.6  | 1.4  | 0.9  | 1.1  | 1.9  | 1.5  | 2.4  | 1.6  | 1.7  | 2.8 | 3.4 | 3.8      | 4.5 | 2.3 | 2.5  | 2.3  | 2.8  | 2.7  | 2.4  | 3.3  | 2.8  | 2.7  | 2.5  |    |
| o__DB1-14_OTU_29           | 0       | 0    | 0    | 0    | 3.2        | 2.4 | 2.6  | 2.2  | 0.9  | 0.6  | 1.6  | 1.2  | 1.9  | 1.2  | 1.3  | 0.9 | 2.1 | 2.1      | 2   | 2.4 | 2.2  | 2.7  | 1.9  | 2.4  | 1.8  | 1.6  | 1.8  | 1.7  | 2.1  |    |
| p__Parcubacteria_OTU_33    | 0       | 0    | 0    | 0    | 2.5        | 2.7 | 2.8  | 0.6  | 0.6  | 0.8  | 1.4  | 1.6  | 1.5  | 0.8  | 1.2  | 1.3 | 1.9 | 1.7      | 1.9 | 2.9 | 3.3  | 1.1  | 2.7  | 2.3  | 2.9  | 2.7  | 2.1  | 0.7  | 1.3  |    |
| Woodsholea                 | 3.6     | 1.3  | 2.5  | 2.9  | 0.9        | 1.4 | 1.2  | 1.1  | 0.5  | 0.5  | 1.3  | 0.9  | 1.6  | 1.5  | 1.9  | 1.6 | 1   | 1.1      | 1.7 | 1.3 | 1.5  | 2.1  | 1.5  | 1.6  | 1.7  | 1.7  | 1.9  | 1.3  | 1.4  |    |
| Nitrosomonas               | 0       | 0    | 0    | 0    | 1.1        | 2.2 | 2.5  | 0.9  | 0.5  | 0.4  | 2    | 1.3  | 1    | 1    | 2.1  | 2   | 2   | 3.4      | 1.9 | 2.7 | 1.2  | 2.4  | 1    | 1.6  | 1.7  | 1.1  | 1.7  | 2.6  | 3.6  |    |
| f__Gallionellaceae_OTU_104 | 0       | 0    | 0    | 0    | 1.6        | 2.1 | 1.7  | 1.6  | 0.6  | 0.4  | 1    | 0.9  | 1.2  | 1.1  | 1.9  | 1.8 | 3.3 | 2.2      | 1.4 | 2.1 | 1.5  | 2.4  | 0.8  | 1.2  | 1.1  | 1    | 1.6  | 1.7  | 1.5  |    |
| p__Parcubacteria_OTU_48    | 0       | 0    | 0    | 0    | 1.7        | 1.3 | 1.8  | 0.6  | 0.4  | 0.5  | 1.1  | 0.7  | 0.9  | 0.5  | 0.5  | 0.6 | 1.1 | 1.2      | 2.2 | 2.2 | 1.7  | 1.3  | 1.4  | 1    | 1.5  | 1.2  | 1.1  | 0.9  | 0.9  |    |
| f__env.OPS 17_OTU_61       | 15.2    | 3.9  | 3.5  | 3.4  | 0          | 0   | 0    | 0    | 0    | 0    | 0    | 0    | 0    | 0    | 0    | 1.8 | 0   | 0        | 0   | 0   | 0    | 0    | 0    | 0    | 0    | 0    | 0    | 0    | 0    |    |
| p__Parcubacteria_OTU_83    | 0       | 0    | 0    | 0    | 1.1        | 1.4 | 2    | 0.5  | 0.3  | 0.6  | 1    | 1    | 1    | 0.5  | 0.6  | 0.7 | 1.2 | 1.1      | 1.1 | 1.3 | 1.8  | 1    | 1.4  | 1.4  | 1.5  | 1.5  | 1.3  | 0.4  | 0.7  |    |
| p__Gracilbacteria_OTU_63   | 0       | 0    | 0    | 0    | 1.7        | 1.2 | 1.1  | 0.5  | 0.4  | 0.5  | 1    | 0.8  | 0.7  | 0.3  | 0.7  | 0.7 | 1.5 | 1.3      | 2.1 | 1.6 | 1.2  | 1.1  | 0.8  | 1.2  | 0.9  | 1.1  | 1.1  | 0.8  | 1.3  |    |
| Sideroxydans               | 0       | 0    | 0    | 0    | 1.5        | 0.9 | 0.7  | 1.3  | 0.2  | 0.2  | 1.3  | 0.5  | 0.7  | 0.5  | 0.6  | 1.1 | 1   | 1.6      | 1.1 | 0.8 | 1.6  | 0.9  | 1.1  | 1    | 1.5  | 1.2  | 1.4  | 1    | 0.9  |    |
| p__Parcubacteria_OTU_67    | 0.1     | 0    | 0    | 0    | 1.3        | 1.2 | 1.1  | 0.5  | 0.3  | 0.4  | 0.7  | 0.7  | 0.8  | 0.5  | 0.5  | 1.1 | 1.1 | 1.2      | 1.2 | 1.5 | 1.2  | 0.9  | 1    | 1.2  | 1.1  | 1.3  | 1.1  | 0.5  | 1.3  |    |
|                            | V       | X    | Y    | Z    | A          | B   | C    | D    | E    | F    | G    | H    | I    | J    | K    | L   | M   | 01       | 02  | 03  | 04   | 05   | 06   | 07   | 08   | 09   | 10   | 11   | 12   | 13 |

Figure SI.2: The 20 most abundant bacteria (phylum, genus) found with amplicon sequencing in **biofilm samples (V-Z)** listed alongside with **downstream (A-M)** and **upstream (01-13) water samples**. V and Z were taken from the *bottom part* of the pipe and X and Y from the *upper part* of the pipe. The colour bar indicates percentage relative abundance in the samples.
